# Supplementary material for: The arthropod associates of 155 North American cynipid oak galls
Source: bioRxiv or medRxiv preprint supplement (doi:10.1101/2022.04.26.489445), 2022-04-29

Supplemental Figure 1. Phylogeny of several Nearctic gall wasps (adapted from Ward et al. 2022) used in Figures 1-8. Numbers are used to assist in referencing tips and clades in manuscript text. "P" indicates a gall wasp is Palearctic in origin.

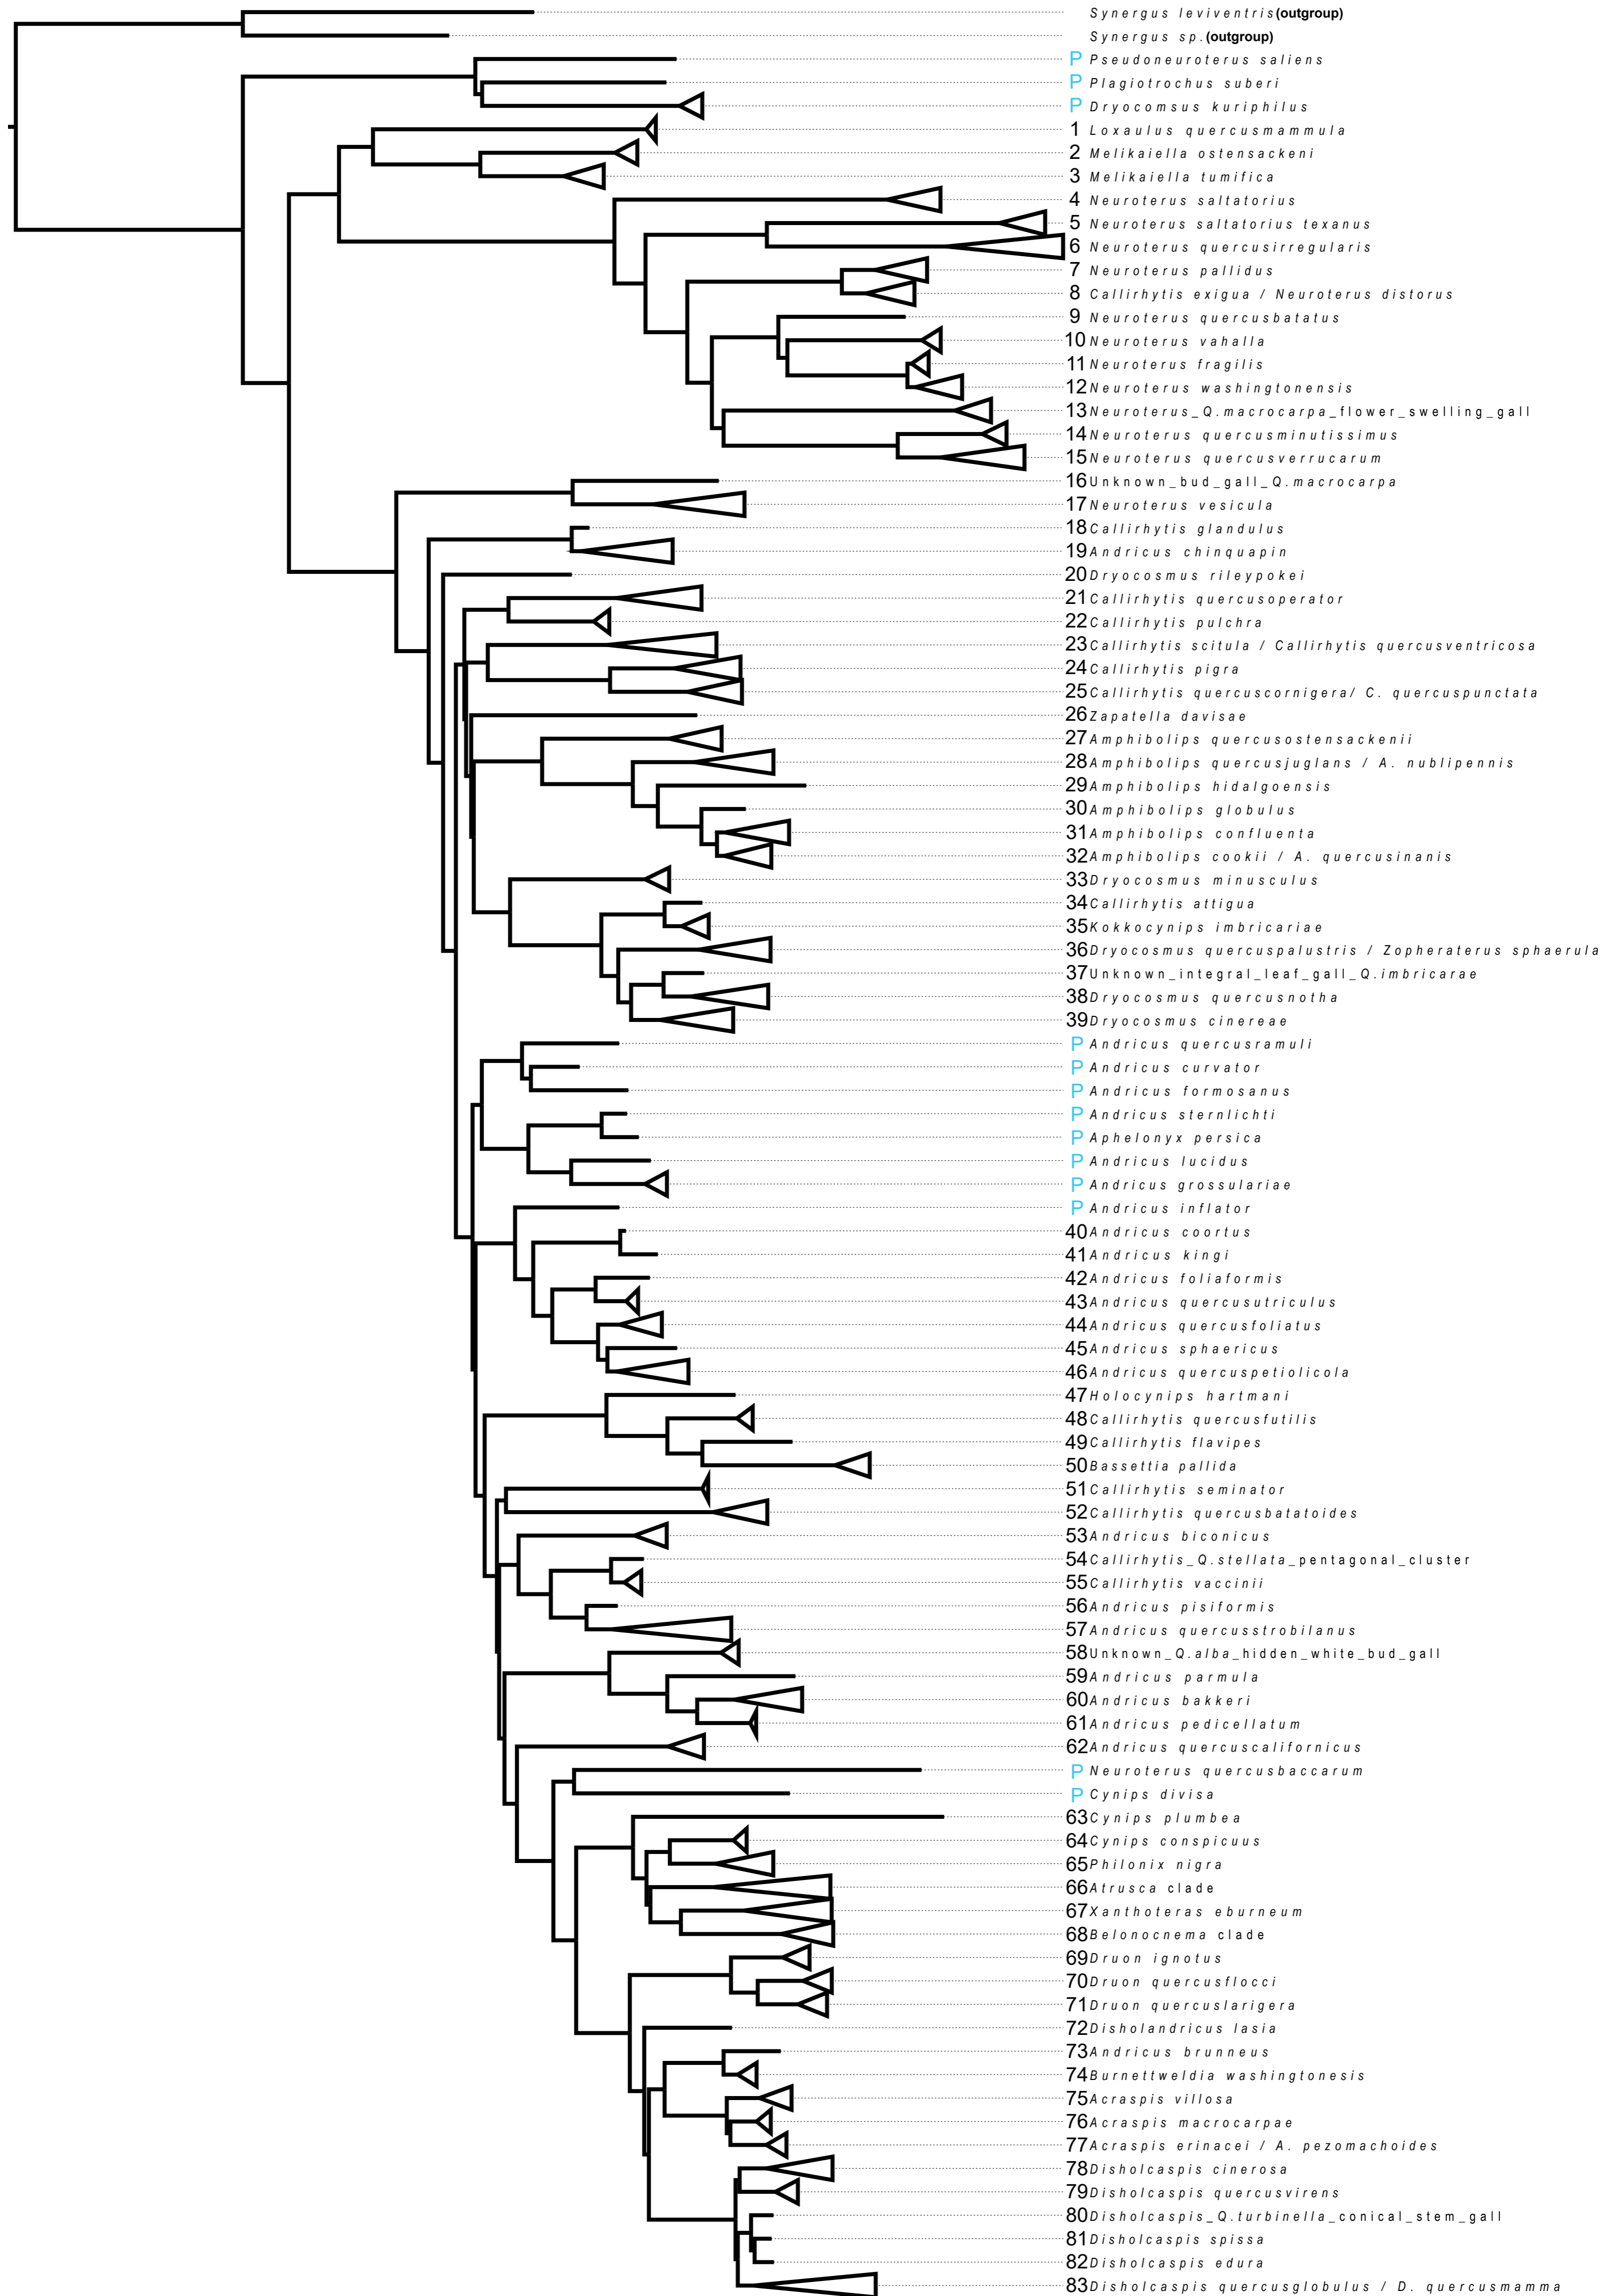

Supplement: Supplementary file [file media-3.pdf]
